# Supplementary material for: A simple and efficient quasi 3-dimensional viscoelastic model and software for simulation of tapping-mode atomic force microscopy
Source: Beilstein J Nanotechnol. 2015 Nov 26;6:2233–41. doi: 10.3762/bjnano.6.229 (PMC4685832; doi:10.3762/bjnano.6.229)
Supplement: File 1 — Program sources and manual. [file Beilstein_J_Nanotechnol-06-2233-s001.zip]

Archive with 3 entries (3 files):
- input.txt
- Trimodal_AFM_with_Quasi3D_SLS+-+Files+Description.pdf
- Trimodal_AFM_with_Quasi3D_SLS.c
