# Supplementary material for: A simple and efficient quasi 3-dimensional viscoelastic model and software for simulation of tapping-mode atomic force microscopy
Source: Beilstein J Nanotechnol. 2015 Nov 26;6:2233–41. doi: 10.3762/bjnano.6.229 (PMC4685832; doi:10.3762/bjnano.6.229)
Supplement: File 1 — Program sources and manual. [file Beilstein_J_Nanotechnol-06-2233-s001.zip › input.txt]

PARAMETER INPUT FILE

OutputFile_1				OutputFileName 
Frequency_1(Hz)				70000
ForceConstant_1(N/m)			4.0
QualityFactor_1				150.0 
QualityFactor_2				450.0 
QualityFactor_3				750.0 
CantileverRestPosition(nm)		95.0
TargetAmplitude_1(nm)			100.0
TargetAmplitude_2(nm)			0.0
TargetAmplitude_3(nm)			0.0
k1(N/m/nm^2)                            7.5e-2	SLS parameter*
k2(N/m/nm^2)                            7.5e-2	SLS parameter*
cDiss(Ns/m/nm^2)			1.0e-7	SLS parameter*

*The spring and damper constants in the model are normalized per unit area.  This is why the units contain 'nm^2' in the denominator.
