# Supplementary material for: A simple and efficient quasi 3-dimensional viscoelastic model and software for simulation of tapping-mode atomic force microscopy
Source: Beilstein J Nanotechnol. 2015 Nov 26;6:2233–41. doi: 10.3762/bjnano.6.229 (PMC4685832; doi:10.3762/bjnano.6.229)
Supplement: File 1 — Program sources and manual. [file Beilstein_J_Nanotechnol-06-2233-s001.zip › Trimodal_AFM_with_Quasi3D_SLS.c]

//*************************** Trimodal AFM with quasi-3D standard linear model surface *********************************

// Programmed by Santiago D. Solares - Please direct any questions to ssolares@gwu.edu
// NOTE: This program was edited using Microsoft Visual Studio - margin alignment may be lost in other editors.  

// HEADERS

#include<stdio.h>
#include<math.h>


// CONSTANTS 

#define 	pi	3.1415926535
#define		TipRadius 20.00						// Tip radius in nm
#define		PartitionSize 300					// Number of concentric rings in the radial partition of the surface
#define		NoPoints 30							// Number of points in the spectroscopy curve
#define		VdwStrength	7.5e-11					// Parameter governing the strength of van der Waals interactions


// GLOBAL VARIABLES 

long int	counter1,counter2;									// counter variables
double		startprint;											// Time when the printing starts
double		printstep;											// Printing interval for the output file 
long int	print_counter1;										// Counter used to control the printing step
double		length;												// Total dynamics run time
double		Zeq;												// Cantilever equilibrium (base) position
double		Zeq_max;											// Maximum cantilever equilibrium position (at the beginning of the spectroscopy curve)
double		Zt_m1, Zt_m2, Zt_m3, Zto_m1, Zto_m2, Zto_m3;		// Eigenmode positions at time t and at time zero
double		Z_1_m1, Z_1_m2, Z_1_m3, Z_2_m1, Z_2_m2, Z_2_m3;		// Positions at the previous timestep (t - delta_t) for the various eigenmodes
double		Vo_m1, Vo_m2, Vo_m3, Vt_m1, Vt_m2, Vt_m3;     		// Initial velocity and velocity at time t for the various eigenmodes
double		at_m1, at_m2, at_m3;								// acceleration at time t for the various eigenmodes
double		time, timestep;										// Simulation time and timestep
double		time1, time2, time3;								// Times used to excite individual eigenmodes (this is redundant here: separation of the excitation times is only useful for schemes such as selff-excitation)
double		mass;												// Equivalent cantilever mass 
double		Freqo_1, Freqo_2, Freqo_3;							// Resonance frequencies of the various eigenmodes
double		InstFreq_1, InstFreq_2, InstFreq_3;					// Instantaneous resonance frequencies (this is redundant here: tracking of the instantaneous resonance frequency is only useful for schemes such as frequency-modulation)
double		period_m1;											// Oscillation period of first mode
double		period_m2;											// Oscillation period of second mode
double		period_m3;											// Oscillation period of third mode
double		Ao_1, Ao_2, Ao_3;									// Target amplitudes for the various eigenmodes
double      Fo_1, Fo_2, Fo_3;									// Excitation force amplitudes for the various eigenmodes
double		QF_m1, QF_m2, QF_m3, kharm_m1, kharm_m2, kharm_m3;	// Quality factors and harmonic constants for the various eigenmodes
FILE		*Out1,*Out2;										// Pointers for output files
FILE		*Inp;												// Pointer for input file
char		string[100];										// String variable used for reading data from the input file
char		input_file[100];									// Input file name
char		output_file_1[100];									// Output file name for every point of the spectroscop curve (for every cantilever position)
char		output_file[100];									// Output file root name
char		output_ForceDepth[100];								// File containing the peak force and depth reached for the entire spectroscopy curve
double		TipPos;												// Instantaneous tip position
double		TipV;												// Instantaneous tip velocity
double		Xb[PartitionSize], Xc[PartitionSize];				// Dashpot variables (arrays): Xb is the position of the surface and Xc is the position of the dashpot in the standard linear solid model
double		Partition[3][PartitionSize];						// Array with information on the system of concentric rings describing the surface
double		k1, k2, cDiss;										// Dashpot constants: k1 is the residual spring, k2 is the dashpot spring, and cDiss is the dashpot constant
double		ForceSLS[PartitionSize];							// Repulsive force exerted by each standard linear solid model
double		TotalForceSLS;										// Total force of all standard linear solid models added
double		MaxForce, PeakDepth;								// Maximum tip-sample force and lowest surface position reached during the oscillation
int			NN;													// Number of periods used to average the phase and amplitude
double		SumA, SumB, SumC, SumD, SumE, SumF;					// Variables used for calculating the phase and amplitude
double		Output_Phase1, Output_Phase2, Output_Phase3;		// Phases of individual eigenmodes
double		Output_Amp1, Output_Amp2, Output_Amp3;				// Amplitudes of individual eigenmodes 
long int	counterPh1, counterPh2, counterPh3;					// Counter variables used in the calculation of the phase


/* DIMENSIONS 

Distance					nm
Time						ns
Tip vertical velocity		m/s
Tip horizontal velocity 	nm/s
Force						N

*/


// BEGINNING OF THE MAIN PROGRAM

main()
{

  // Opening input file (note that the input file must be in the same directory as the executable)

  sprintf(input_file,"input.txt");
  Inp = fopen(input_file,"r");

  // Reading the parameters in the input file

  do                    // OUTPUT FILE NAME 
  {
    fscanf(Inp,"%s",string);
  } while (strncmp(string,"OutputFile_1",12) != 0);
  fscanf(Inp,"%s",output_file);

  do                    // FUNDAMENTAL FREQUENCY
  {
    fscanf(Inp,"%s",string);
  } while (strncmp(string,"Frequency_1",11) != 0);
  fscanf(Inp,"%lf",&Freqo_1);

  do                    // FIRST HARMONIC CONSTANT
  {
    fscanf(Inp,"%s",string);
  } while (strncmp(string,"ForceConstant_1",15) != 0);
  fscanf(Inp,"%lf",&kharm_m1);
  
  do                    // FIRST QUALITY FACTOR
  {
    fscanf(Inp,"%s",string);
  } while (strncmp(string,"QualityFactor_1",15) != 0);
  fscanf(Inp,"%lf",&QF_m1);

  do                    // SECOND QUALITY FACTOR
  {
    fscanf(Inp,"%s",string);
  } while (strncmp(string,"QualityFactor_2",15) != 0);
  fscanf(Inp,"%lf",&QF_m2);

  do                    // THIRD QUALITY FACTOR
  {
    fscanf(Inp,"%s",string);
  } while (strncmp(string,"QualityFactor_3",15) != 0);
  fscanf(Inp,"%lf",&QF_m3);

  do                    // CANTILEVER REST POSITION AT TIME ZERO
  {
    fscanf(Inp,"%s",string);
  } while (strncmp(string,"CantileverRestPosition",22) != 0);
  fscanf(Inp,"%lf",&Zeq_max);

  Zeq_max = Zeq_max*1e-9;		// Converting to meters

  do                    // FIRST AMPLITUDE TARGET
  {
    fscanf(Inp,"%s",string);
  } while (strncmp(string,"TargetAmplitude_1",17) != 0);
  fscanf(Inp,"%lf",&Ao_1);

  Ao_1 = Ao_1*1e-9;		// Converting to meters

  do                    // SECOND AMPLITUDE TARGET
  {
    fscanf(Inp,"%s",string);
  } while (strncmp(string,"TargetAmplitude_2",17) != 0);
  fscanf(Inp,"%lf",&Ao_2);

  Ao_2 = Ao_2*1e-9;		// Converting to meters

  do                    // THIRD AMPLITUDE TARGET
  {
    fscanf(Inp,"%s",string);
  } while (strncmp(string,"TargetAmplitude_3",17) != 0);
  fscanf(Inp,"%lf",&Ao_3);

  Ao_3 = Ao_3*1e-9;		// Converting to meters

  do                    // RESIDUAL SLS SPRING
  {
    fscanf(Inp,"%s",string);
  } while (strncmp(string,"k1",2) != 0);
  fscanf(Inp,"%lf",&k1);

  do                    // DASHPOT SLS SPRING
  {
    fscanf(Inp,"%s",string);
  } while (strncmp(string,"k2",2) != 0);
  fscanf(Inp,"%lf",&k2);

  do                    // DASHPOT CONSTANT
  {
    fscanf(Inp,"%s",string);
  } while (strncmp(string,"cDiss",5) != 0);
  fscanf(Inp,"%lf",&cDiss);

  // Output file with the peak force and depth

  sprintf(output_ForceDepth,"%s_ForceDepth.txt",output_file);
  Out2 = fopen(output_ForceDepth,"w");
  fprintf(Out2,"Zcf\tForce\tDepth\tAmp1\tAmp2\tAmp3\tPhase1\tPhase2\tPhase3\n");

  // Defining the number of periods used in calculating the phase

  NN = 25;

for (counter1 = NoPoints; counter1 > 0; counter1--)		// This routine will be repeated for various values (= NoPoints) of cantilever position
{

  // Initializing phase counters

  counterPh1 = 0;
  counterPh2 = 0;
  counterPh3 = 0;

  // Resetting the maximum depth and tip-sample force 

  MaxForce = 0.0;
  PeakDepth = 0.0;

  // Defining cantilever equilibrium position

  Zeq = 1.0*counter1/NoPoints*Zeq_max;

  // Timestep

  timestep = 0.01*1e-9;

  // Calculation of second and third frequencies

  Freqo_2 = 6.25*Freqo_1;
  Freqo_3 = 17.6*Freqo_1;  

  // Calculation of the oscillation periods 

  period_m1 = 1.0/Freqo_1;
  period_m2 = period_m1/6.25;
  period_m3 = period_m1/17.6;

  // Defining run length

  length = period_m1*2.5*QF_m1;

  // Start of printing

  startprint = period_m1*2.0*QF_m1;

  // Printstep

  printstep = 0.0001*period_m1;

  // Calculating the equivalent mass from the resonance frequency and the harmonic spring constant

  mass = kharm_m1 / pow( (2*pi*Freqo_1), 2);

  // Calculation of the harmonic constants for the second and third eigenmodes

  kharm_m2 = kharm_m1*(Freqo_2/Freqo_1)*(Freqo_2/Freqo_1);
  kharm_m3 = kharm_m1*(Freqo_3/Freqo_1)*(Freqo_3/Freqo_1);

  // Calculation of the excitation force amplitudes for the various eigenmodes

  Fo_1 = Ao_1*kharm_m1/QF_m1;
  Fo_2 = Ao_2*kharm_m2/QF_m2;
  Fo_3 = Ao_3*kharm_m3/QF_m3;

// DYNAMICS INTEGRATION SECTION

  // Initialization of position for the various eigenmodes

  Zto_m1 = 0.0001e-9;
  Zto_m2 = 0.0001e-9;
  Zto_m3 = 0.0001e-9;

  // Initialization of velocity for the various eigenmodes

  Vo_m1 = 0.0000001e-9;  
  Vo_m2 = 0.0000001e-9;
  Vo_m2 = 0.0000001e-9;

  // Initialization of position and time for the various eigenmodes

  Z_2_m3 = Zto_m3;
  Z_2_m2 = Zto_m2;
  Z_2_m1 = Zto_m1;

  Z_1_m1 = Zto_m1 + Vo_m1*timestep;
  Z_1_m2 = Zto_m2 + Vo_m2*timestep;
  Z_1_m3 = Zto_m3 + Vo_m3*timestep;

  time = 0.0;
  time1 = 0.0;
  time2 = 0.0;
  time3 = 0.0;

  // Initialization of excitation frequencies

  InstFreq_1 = Freqo_1;
  InstFreq_2 = Freqo_2;
  InstFreq_3 = Freqo_3;

  // Changing the name of the output file

  sprintf(output_file_1,"%s_%.2f.txt",output_file,Zeq*1e9);

  // Opening the output file

  Out1 = fopen(output_file_1,"w"); 

  // Printing the output file header

  fprintf(Out1,"time(ns)\tZeq(nm)\tZt_m1\tZt_m2\tZt_m3\tTipPos\tXb_SpecifiedPosition\tXc_SpecifiedPosition\tTotalForceSLS\tAmp1\tAmp2\tAmp3\tPh1\tPh2\tPh3\tForce_0\tForce_3\tForce_6\tForce_9\n");

  // Initializing the print counters

  print_counter1 = 0;

  // Initializing SLS variables

  for (counter2 = 0; counter2 < PartitionSize; counter2++)
  {
    Xb[counter2] = 0.0;		// Surface position
	Xc[counter2] = 0.0;		// Dashpot position
  }

  // Filling up the Partition[3][PartitionSize] array (Partition[0][counter2] = Rmax of interval; Partition[1][counter2] = area of interval; Partition[2][counter2] = TipHeight with respect to tip apex for each interval (this accounts for the tip geometry))
  // The tip height with respect to the apex will follow a spherical profile up to 0.95*Rtip.  After that it will simply increase with a slope of 4 (this is equivalent to an angle of ~14 degrees with respect to vertical)

  for (counter2 = 0; counter2 < PartitionSize; counter2++)
  {
	Partition[0][counter2] = counter2*TipRadius*0.95/(0.6*PartitionSize);		// At interval number (0.6*PartitionSize) the radius will be 0.95 of the tip radius
	Partition[1][counter2] = pi*(Partition[0][counter2]+TipRadius*0.95/(0.6*PartitionSize))*(Partition[0][counter2]+TipRadius*0.95/(0.6*PartitionSize)) - pi*(Partition[0][counter2])*(Partition[0][counter2]);
	
    // Accounting for tip geometry

	if (counter2 < (0.6*PartitionSize))
	  Partition[2][counter2] = TipRadius - sqrt(TipRadius*TipRadius - Partition[0][counter2]*Partition[0][counter2]);
	else
	  Partition[2][counter2] = Partition[2][counter2-1] + 4*TipRadius*0.95/(0.6*PartitionSize);
  }


  do	// Integration loop
  { 

    // Incrementing the time for each eigenmode	  
	  
    time = time + timestep;
    time1 = time1 + timestep;
    time2 = time2 + timestep;
    time3 = time3 + timestep;


    // Calculating the acceleration for the three eigenmodes using the equations of motion

    at_m1 = ( -kharm_m1*Zt_m1 - (mass*Freqo_1*(2*pi)*Vt_m1/QF_m1) + Fo_1*cos(InstFreq_1*2*pi*time1) + Fo_2*cos(InstFreq_2*2*pi*time2) + Fo_3*cos(InstFreq_3*2*pi*time3) + TotalForceSLS) /mass;

    at_m2 = ( -kharm_m2*Zt_m2 - (mass*Freqo_2*(2*pi)*Vt_m2/QF_m2) + Fo_1*cos(InstFreq_1*2*pi*time1) + Fo_2*cos(InstFreq_2*2*pi*time2) + Fo_3*cos(InstFreq_3*2*pi*time3) + TotalForceSLS) /mass;

    at_m3 = ( -kharm_m3*Zt_m3 - (mass*Freqo_3*(2*pi)*Vt_m3/QF_m3) + Fo_1*cos(InstFreq_1*2*pi*time1) + Fo_2*cos(InstFreq_2*2*pi*time2) + Fo_3*cos(InstFreq_3*2*pi*time3) + TotalForceSLS) /mass;

	// Resetting the SLS force

	TotalForceSLS = 0.0;

    // Calculating the velocity and position using the Verlet algorithm
    
	// NOTE: the Verlet algorithm provides fourth order accuracy on the position but only second order accuracy on the velocity (otherr algorithms may be more efficient, depending on the problem)
    
    Zt_m1 = 2*Z_1_m1 - Z_2_m1 + at_m1*timestep*timestep;
    Zt_m2 = 2*Z_1_m2 - Z_2_m2 + at_m2*timestep*timestep;
    Zt_m3 = 2*Z_1_m3 - Z_2_m3 + at_m3*timestep*timestep;

    Vt_m1 = (Zt_m1 - Z_2_m1)/2/timestep;
    Vt_m2 = (Zt_m2 - Z_2_m2)/2/timestep;
    Vt_m3 = (Zt_m3 - Z_2_m3)/2/timestep;

    // Updating Z_2 and Z_1
    
    Z_2_m1 = Z_1_m1;
    Z_2_m2 = Z_1_m2;
    Z_2_m3 = Z_1_m3;

    Z_1_m1 = Zt_m1;
    Z_1_m2 = Zt_m2;
    Z_1_m3 = Zt_m3;

    // Calculating tip position and velocity

    TipPos = Zt_m1 + Zt_m2 + Zt_m3 + Zeq;
    TipV = Vt_m1 + Vt_m2 + Vt_m3;

	// Relaxation of the SLS for each element in the partition

	for (counter2 = 0; counter2 < PartitionSize; counter2++)
	{
      if (TipPos + Partition[2][counter2]*1e-9 > Xb[counter2])
      {
        if (k2*Xc[counter2]/(k1+k2) > (TipPos + Partition[2][counter2]*1e-9))
        {
          Xb[counter2] = (TipPos + Partition[2][counter2]*1e-9);
          ForceSLS[counter2] = -k1*Xb[counter2] -k2*(Xb[counter2]-Xc[counter2]) - VdwStrength;							
        }
        else
        {
          Xb[counter2] = k2*Xc[counter2]/(k1+k2);
          ForceSLS[counter2] = -VdwStrength*0.2e-9*0.2e-9/(((TipPos + Partition[2][counter2]*1e-9) - Xb[counter2])+0.2e-9)/(((TipPos + Partition[2][counter2]*1e-9) - Xb[counter2])+0.2e-9);		// only vdw interaction - here a minimum tip-surface separation distance of 0.2 nm is considered          
        }
        Xc[counter2] = Xc[counter2] + timestep*(1/cDiss)*k2*(Xb[counter2]-Xc[counter2]);
      }

      else
      {
        Xb[counter2] = (TipPos + Partition[2][counter2]*1e-9);
        ForceSLS[counter2] = -k1*Xb[counter2] -k2*(Xb[counter2]-Xc[counter2]) - VdwStrength;
        Xc[counter2] = Xc[counter2] + timestep*(1/cDiss)*k2*(Xb[counter2]-Xc[counter2]);
      }
	}

	// Adding the force from all SLS contributions to obtain the total force on the AFM tip

	for (counter2 = 0; counter2 < PartitionSize; counter2++)
      TotalForceSLS = TotalForceSLS + ForceSLS[counter2]*Partition[1][counter2];


  // Calculation of phase and amplitude - only if time > 0.9*startprint

  if (time > 0.9*startprint)
  {

        
    SumA = SumA+cos(Freqo_1*2*pi*time)*Zt_m1*timestep;
    SumB = SumB+sin(Freqo_1*2*pi*time)*Zt_m1*timestep;
		
    SumC= SumC+cos(Freqo_2*2*pi*time)*Zt_m2*timestep;
    SumD= SumD+sin(Freqo_2*2*pi*time)*Zt_m2*timestep;
		
    SumE= SumE+cos(Freqo_3*2*pi*time)*Zt_m3*timestep;
    SumF= SumF+sin(Freqo_3*2*pi*time)*Zt_m3*timestep;


    if (time > counterPh1*NN*period_m1)
    {
      Output_Phase1 = atan(SumB/SumA)*180/pi;
      if (Output_Phase1 < 0)
        Output_Phase1 = Output_Phase1 + 180;
      Output_Amp1 = sqrt(SumA*SumA+SumB*SumB)*Freqo_1*2/NN;
		  
      counterPh1 = counterPh1 + 1;
         
      SumA = 0;
      SumB = 0;


    }

    if (time > counterPh2*7.0*NN*period_m2)		// The number of periods for the second mode is multiplied by seven
    {
      Output_Phase2 = atan(SumD/SumC)*180/pi;
      if (Output_Phase2 < 0)
        Output_Phase2 = Output_Phase2 + 180;
      Output_Amp2 = sqrt(SumC*SumC+SumD*SumD)*Freqo_2*2/NN/7.0;

      counterPh2 = counterPh2 + 1;

      SumC = 0;
      SumD = 0;

    }

    if (time > counterPh3*20.0*NN*period_m3)		// The number of periods for the third mode is multiplied by twenty
    {
      Output_Phase3 = atan(SumF/SumE)*180/pi;
      if (Output_Phase3 < 0)
        Output_Phase3 = Output_Phase3 + 180;
      Output_Amp3 = sqrt(SumE*SumE+SumF*SumF)*Freqo_3*2/NN/20.0;

      counterPh3 = counterPh3 + 1;

      SumE = 0;
      SumF = 0;

    }

  }		// End of calculation of the phase (done only when time > 0.9*startprint)

  
  // Calculation of peak force and depth

  if ((time>=startprint) && (time <= (length)))
  {
    if (TipPos < PeakDepth)
      PeakDepth = TipPos;
    if (TotalForceSLS > MaxForce)
      MaxForce = TotalForceSLS;
  } 

  // Output file printing
    
    if ((time>=startprint) && (time <= (length))) 
    {       
     
      if (time > (startprint + print_counter1*printstep))
      {
        print_counter1 = print_counter1+1;
        fprintf(Out1,"%.12f\t%10.4f\t%10.4f\t%10.4f\t%10.4f\t%10.4f\t%10.4f\t%10.4f\t%10.4f\t%10.4f\t%10.4f\t%10.4f\t%10.4f\t%10.4f\t%10.4f\t%10.4f\t%10.4f\t%10.4f\t%10.4f\n",time,Zeq*1e9,Zt_m1*1e9,Zt_m2*1e9,Zt_m3*1e9,TipPos*1e9,Xb[0]*1e9,Xc[0]*1e9,TotalForceSLS*1e9,Output_Amp1*1e9,Output_Amp2*1e9,Output_Amp3*1e9,Output_Phase1,Output_Phase2,Output_Phase3,1e9*ForceSLS[0]*Partition[1][0],1e9*ForceSLS[3]*Partition[1][3],1e9*ForceSLS[6]*Partition[1][6],1e9*ForceSLS[9]*Partition[1][9]); 
      }
    }

  } while (time < (length));


  // Closing output file for each cantilever position

  fclose(Out1);

  // Writing the peak force and depth

  fprintf(Out2,"%8.4f\t%8.4f\t%8.4f\t%8.4f\t%8.4f\t%8.4f\t%8.4f\t%8.4f\t%8.4f\n",Zeq*1e9,MaxForce*1e9,PeakDepth*1e9,Output_Amp1*1e9,Output_Amp2*1e9,Output_Amp3*1e9,Output_Phase1,Output_Phase2,Output_Phase3);
  

}	// End of FOR loop (for each cantilever position)


  // Closing input file

  fclose(Inp);
  
  // Closing the peak force and depth file

  fclose(Out2);

}	// End of MAIN
